# Supplementary material for: Development of a new analysis method evaluating adsorption energies for the respective ion-exchanged sites on alkali-metal ion-exchanged ZSM-5 utilizing CO as a probe molecule: IR-spectroscopic and calorimetric studies combined with a DFT method
Source: Royal Society of Chemistry journal article supplement (doi:10.1039/b818323f), 2009-01-01
Supplement: b818323f.pdf [file b818323f.pdf]

Fig. S1. R. Kumashiro et al.,

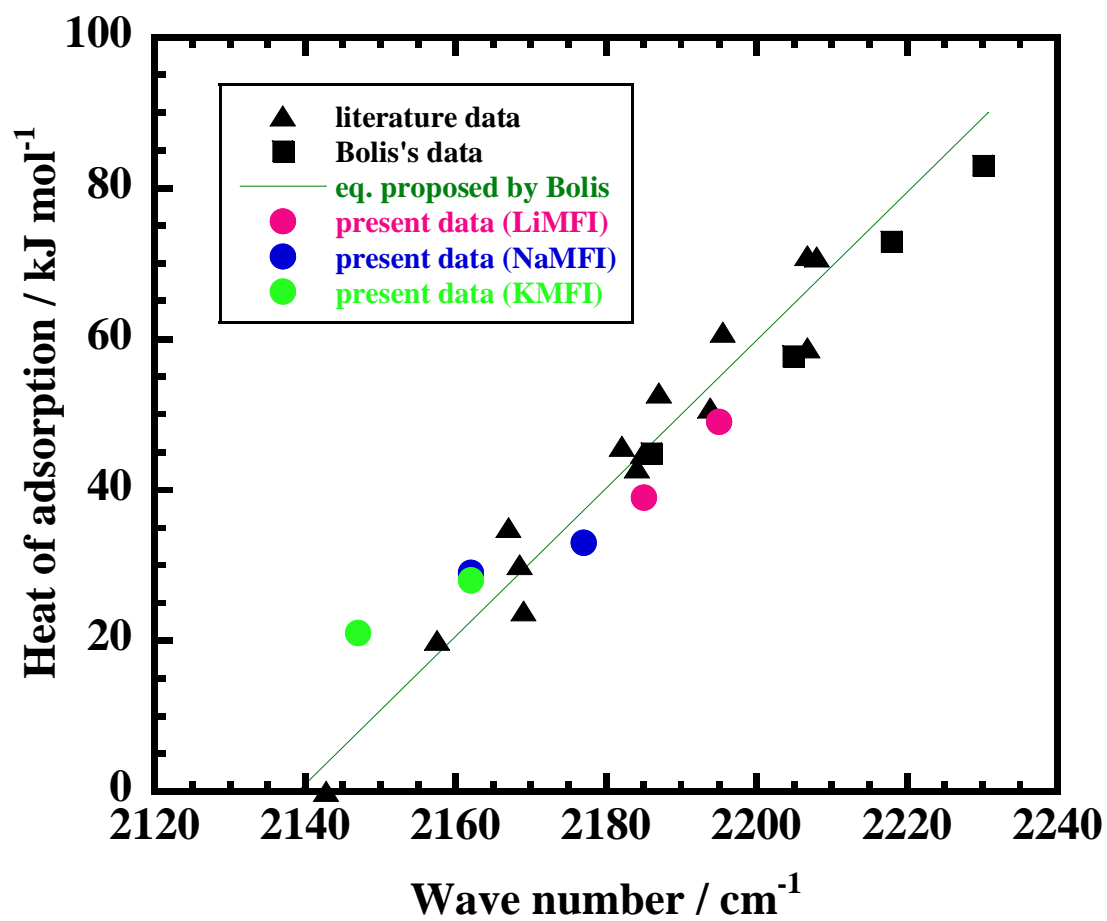

Fig. S2. R. Kumashiro et al.,

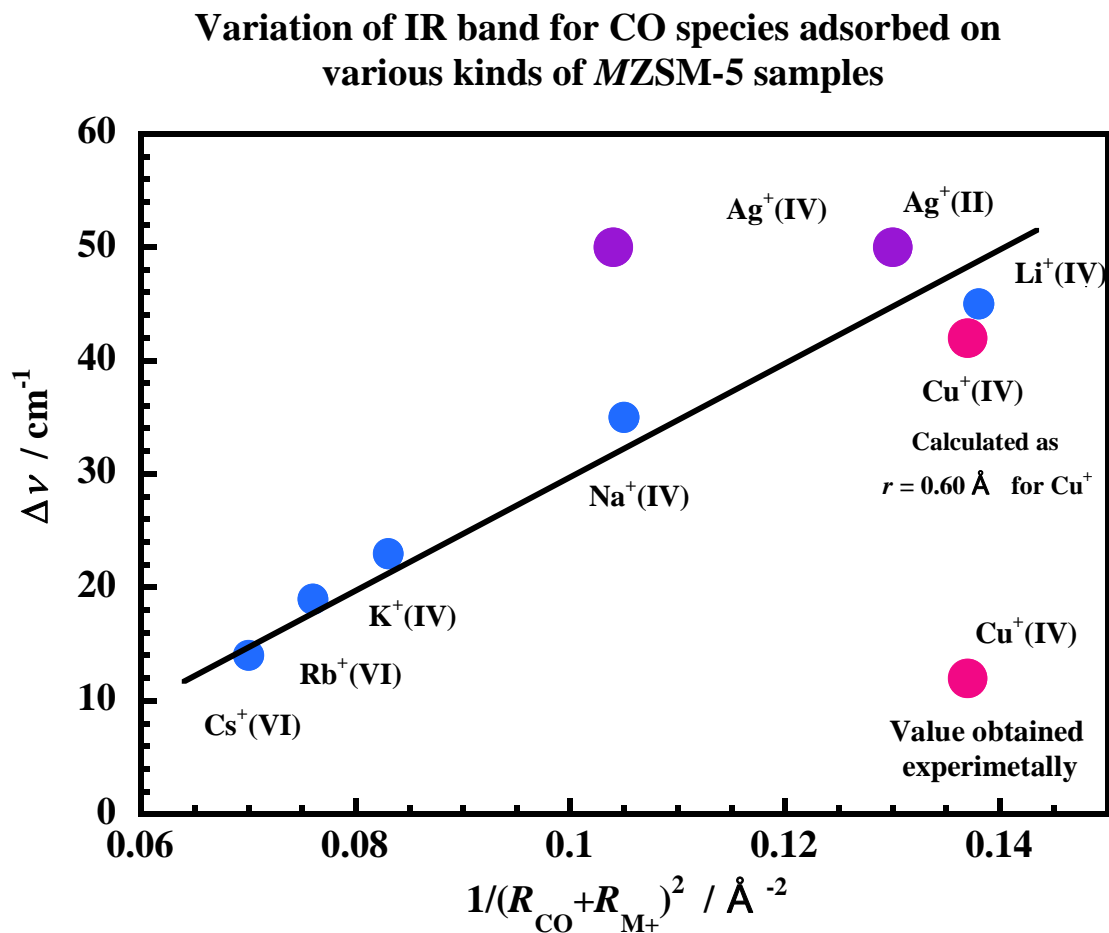

Figure S-3 (a). R. Kumashiro et al.,

1) Two-coordination

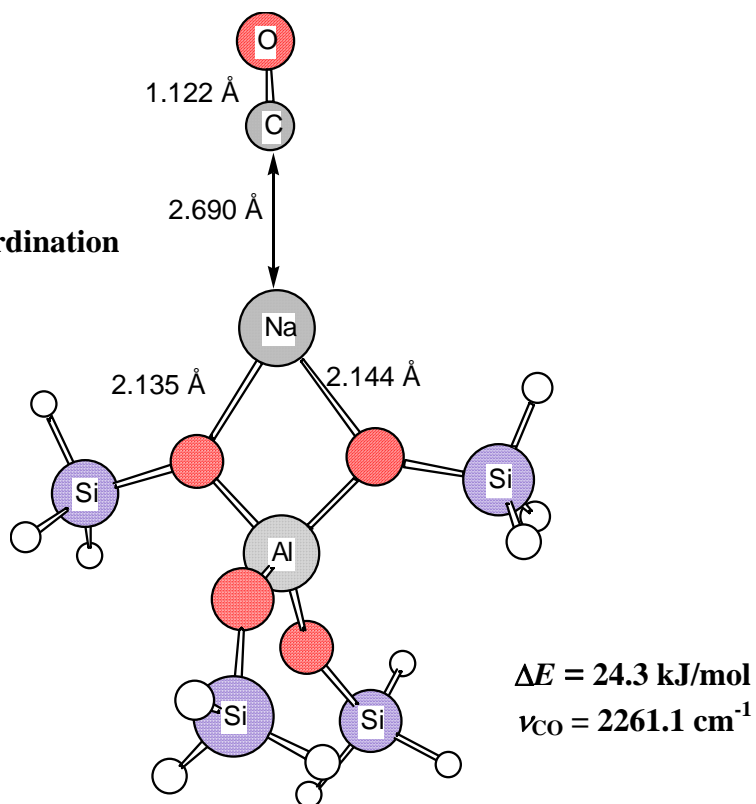

2) Three-coordination

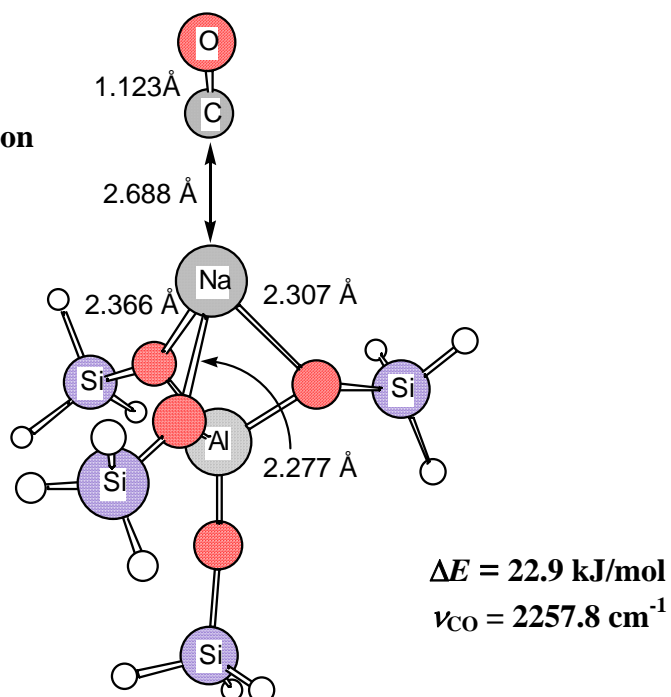

Figure S-3 (b). R. Kumashiro et al.,

1) Two-coordination

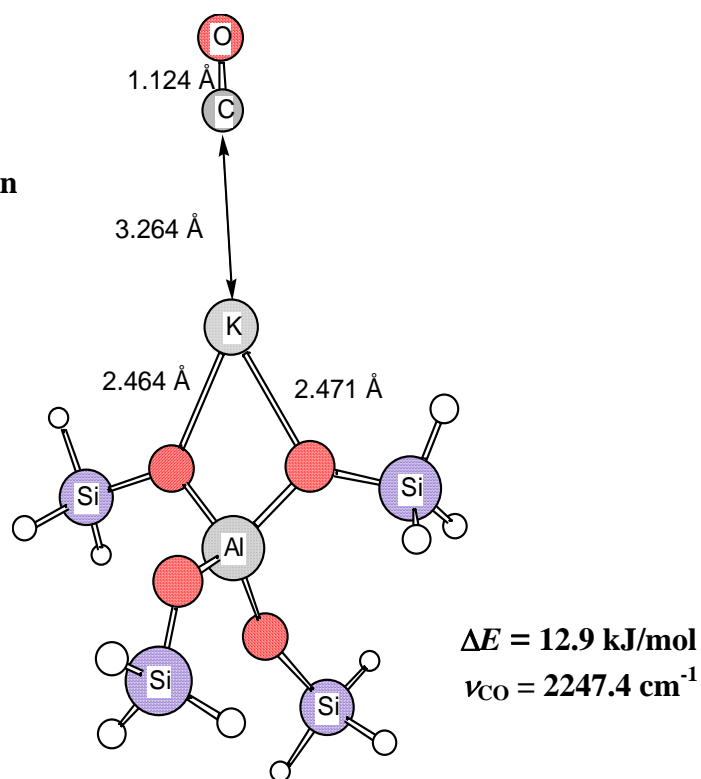

2) Three-coordination

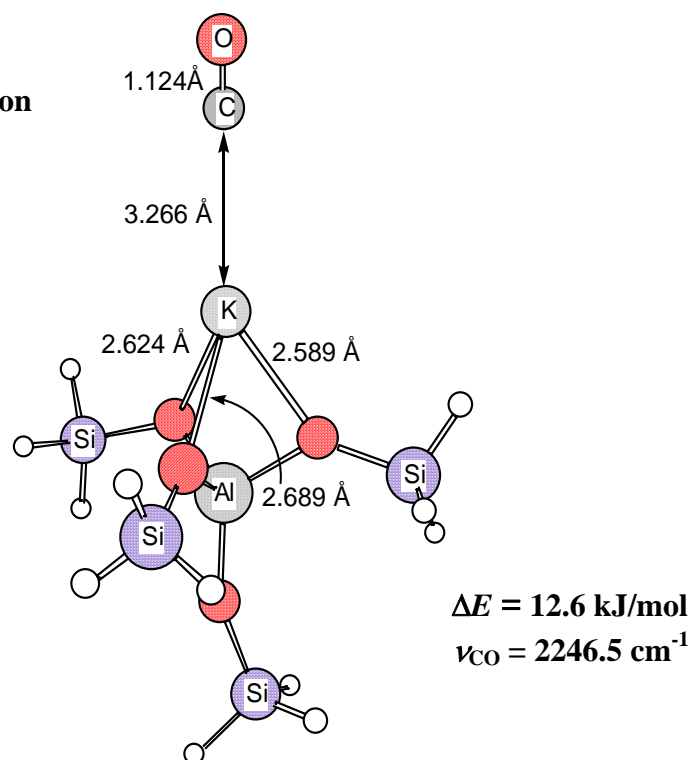

### Supplemental information

Figure S-1. The plots for the present *MZSM-5*—CO systems were well expressed by the equation proposed by Bolis et al.<sup>55</sup> in which both our results and the data cited from Bolis's work were also plotted.

Figure S-2. The relation of CO frequency-shifts vs.  $1/(R_M + R_{CO})^2$  for the different alkali-metal-ion exchanged ZSM-5 samples, as well as copper- and silver-ion-exchanged ZSM-5 samples for the respective sites having different coordination environments.

Figure S-3. Results of DF calculation for the CO species adsorbed on two types of (a) sodium- and (b) potassium-ion-exchanged sites with the different coordination environments.
